# Supplementary material
Source: PubMed Central journal article supplement (PMC3258612)
Supplement: 1108884109_pnas.201108884SI.pdf [file 1108884109_pnas.201108884SI.pdf]

# Supporting Information

Incardona et al. 10.1073/pnas.1108884109

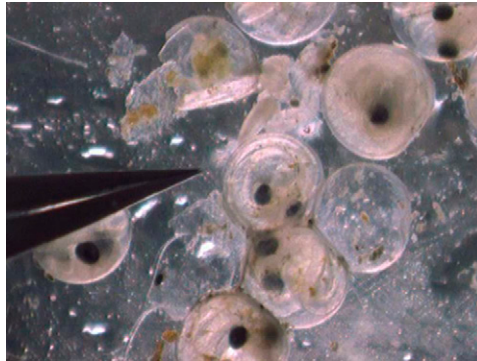

**Movie S1.** Immotility of naturally spawned embryos from oiled site sampled in 2008 and normal motility in 2010 repeat samples from the same location. Three video segments first show (A) immotile and opaque embryos within the chorions from oiled site PP in 2008, (B) uncoiled, dechorionated embryos showing lack of touch response, and (C) viable embryos with normal motility within the chorions from site PP in 2010.

[Movie S1](#)

## Other Supporting Information Files

[SI Appendix \(PDF\)](#)

[Dataset S1 \(XLS\)](#)
